# Supplementary material
Source: Springer Nature journal article supplement (https://www.springermedizin.de/resource/supplementary/12985_2010_1019_MOESM6_ESM.pdf/9608966)
Supplement: MOESM6 [file 9608966]

## EuMV-YP

DNA-B 335- CTTAACATATCC**T**CAGTGCGATGTTCCCAAAGATGAAGTTCTTCAGATGCT -385

|||||

DNA-A 2433- CTTAACATATCCTCAGTGCGATGTTCCCAAAGATGAAGTTCTTCAGATGCT -2383

## EuMV-JaI

DNA-B 338- TTCTTAACATATCCGCAGTGCGATGTTCCCAAAGA -372

|||||

DNA-A 2430- TTCTTAACATATCCGCAGTGCGATGTTCCCAAAGA -2396

## TMYLCAV

DNA-B 285- TCTT**G**ACATATCC**T**CA**A**TGCGATGTTCCCAAAGATG -320

|||||

DNA-A 2423- TCTTGACATATCCTCAATGCGATGTTCCCAAAGATG -2388

## EuYMV

DNA-B 268- CTGTCGTCAAGCCGACGTACATCCGAGTCGCTCGAGAGCTCCACG -312

|||||

DNA-A 2382- CTGTCGTCAAGCCGACGTACATCCGAGTCGCTCGAGAGCTCCACG -2338

## CILCrV

DNA-B 364 AATCGAGCTCCGACGTCAAGTCCTACGTCGACAAAGACGGGGATAC- 409

|||||

DNA-A 2299 AATCGAGCTCCGACGTCAAGTCCTACGTCGACAAAGACGGGGATAC -2254
